# Supplementary material for: Alarmerend beeld onder personeel ggz; uitputting, angst- en somberheidsklachten met mogelijk vertrek uit de ggz als gevolg
Source: Springer Nature journal article supplement (doi:10.1007/s12508-022-00353-y), 2022-06-24
Supplement: MOESM1 [file 23205290]



# Factsheet uitkomsten Mentale gezondheid

**Algemene uitkomsten ten tijde  
van COVID-pandemie**

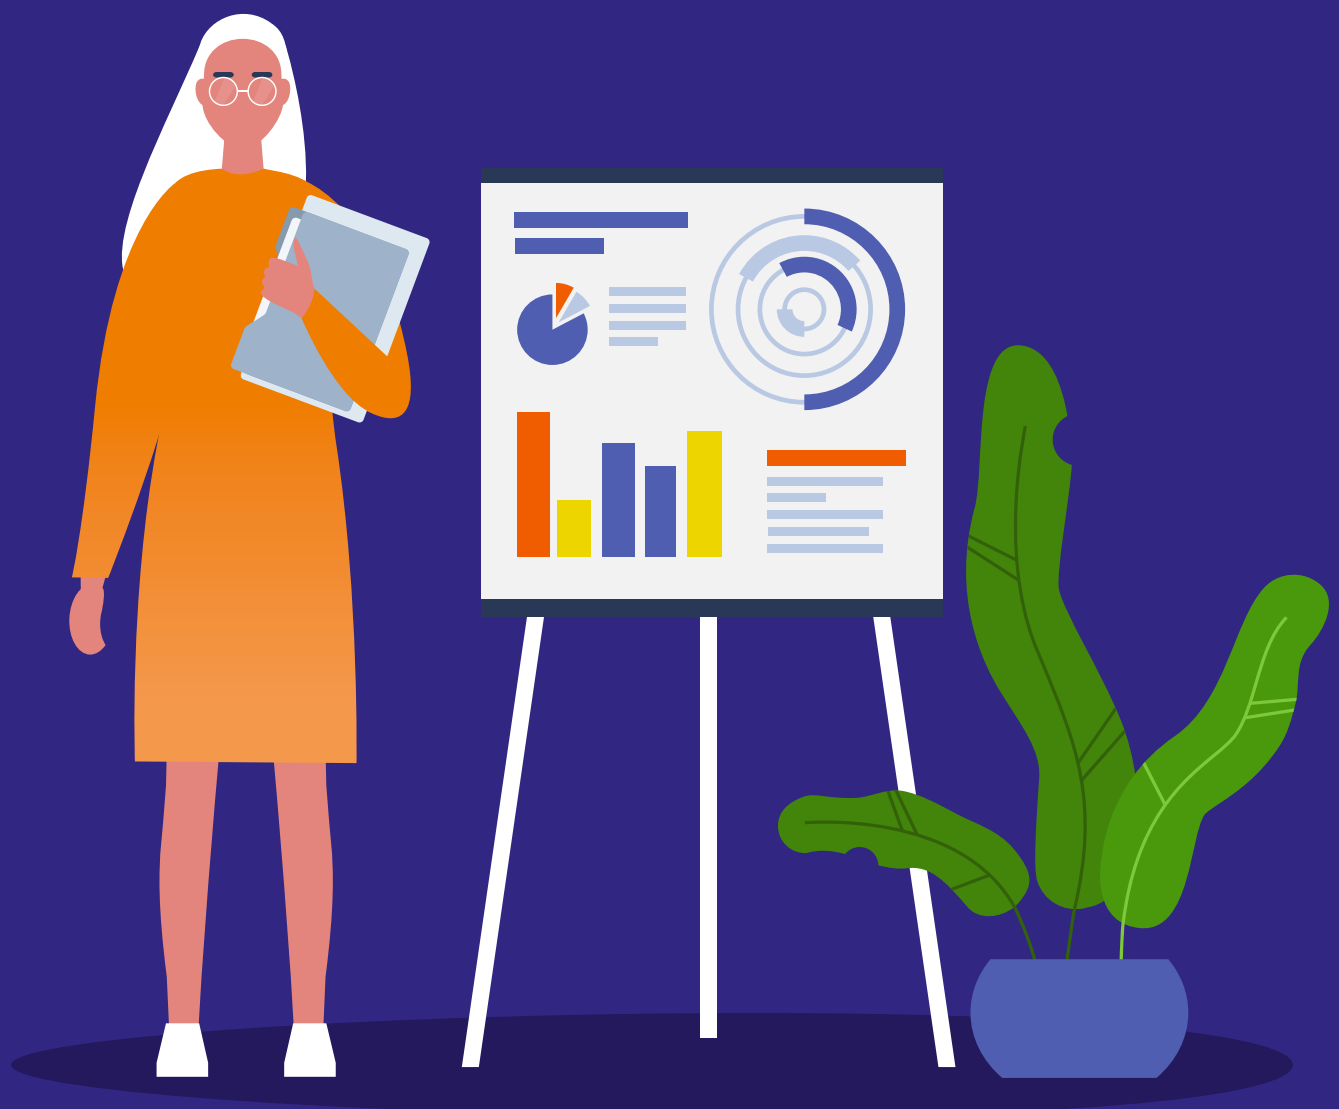

# De algemene uitkomsten

## Gespannenheid

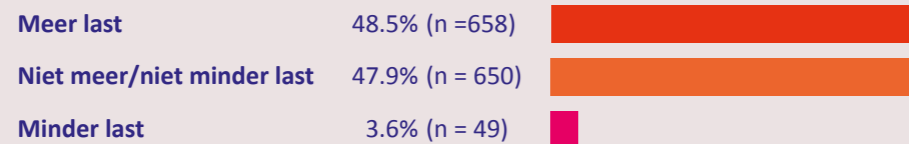

## Somberheid

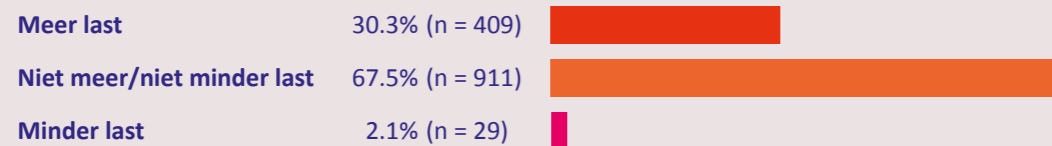

## Angst

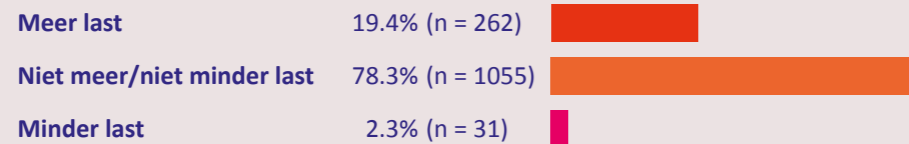

Verder gaf 23.6% (n = 318) van de respondenten aan meer last te ervaren van gevoelens van boosheid en 14.2% (n = 190) gaf aan meer last te hebben van verdriet. Gemiddeld gezien gaven respondenten aan significant minder goed in hun vel te zitten tijdens de pandemie dan ten opzichte van voor de pandemie.

Over alle respondenten gezien geeft 27.8% aan dat de pandemie enigszins heeft bijgedragen aan dit verminderd functioneren en 28.6% gaf aan dat dit volledig als gevolg van de pandemie gezien wordt.

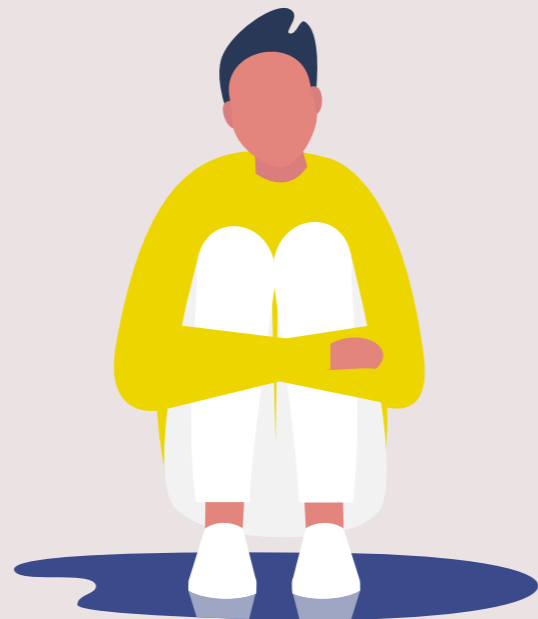

## De balans tussen werk/privé is vanwege het thuiswerken meer doorgeslagen naar werk

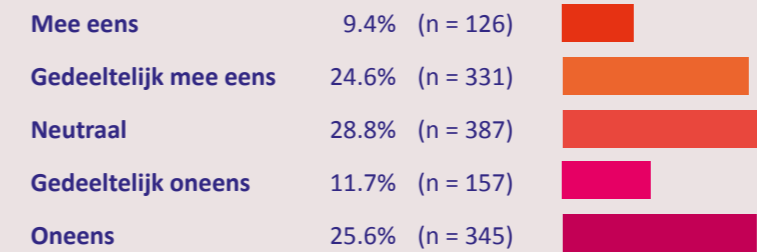

Verder gaf 15.8 tot 33.8% van de respondenten aan minder goed de balans te kunnen houden tussen werk en privé. Over het algemeen gezien gaf men wel aan de balans tussen werk en privé weer terug te kunnen brengen (33.8%). 3.7-16.7% van de respondenten gaf aan dat het hen niet lukt om deze balans (weer) terug te brengen.

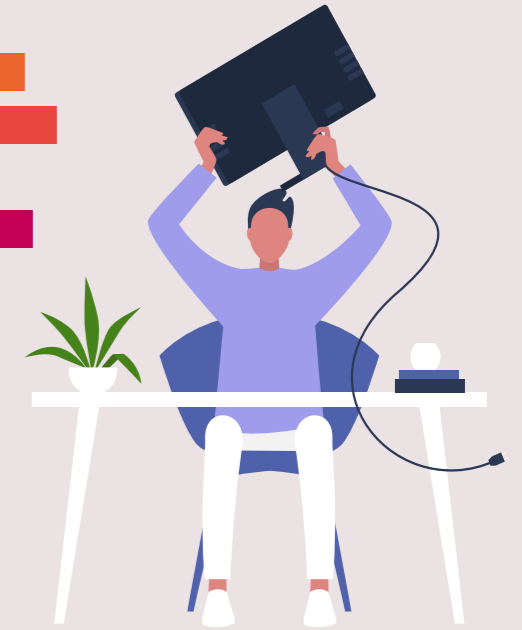

## Ziekteverlof/verzuim

Ik heb meer ziekteverlof opgenomen

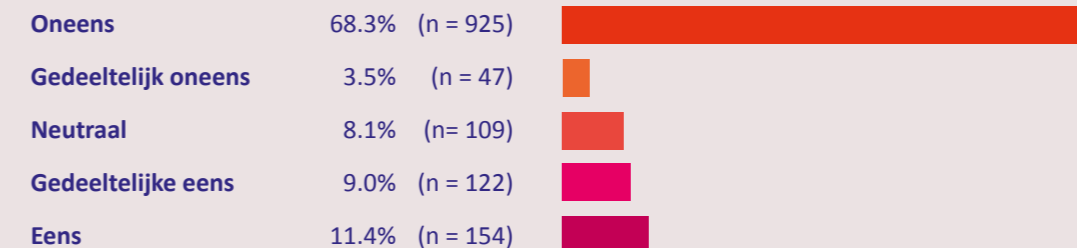

## Ziekteverlof/verzuim

Ik heb meer (losse) vrije dagen opgenomen

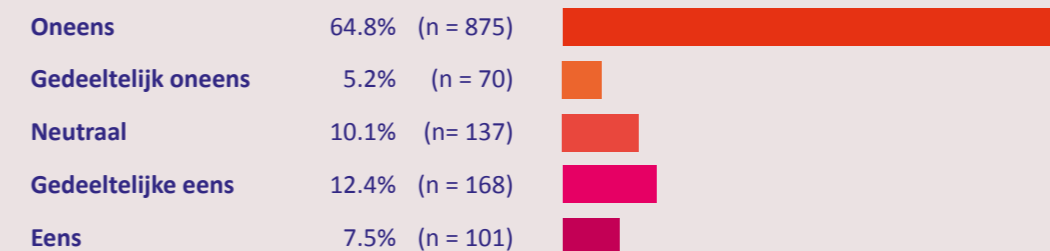

## Werk anders inrichten naar aanleiding van de coronapandemie?

Op de laatste vraag, of men naar aanleiding van de coronapandemie overweegt om het werk anders in te richten, gaf 56.9% (n=767) aan dit niet te overwegen. 425 respondenten (31.5%) gaf aan meer thuis te willen blijven/gaan werken, 56 respondenten (4.2%) gaf aan te overwegen om te stoppen met werken in de zorg en 101 (7.5%) van de respondenten gaf aan minder uur te willen gaan werken.

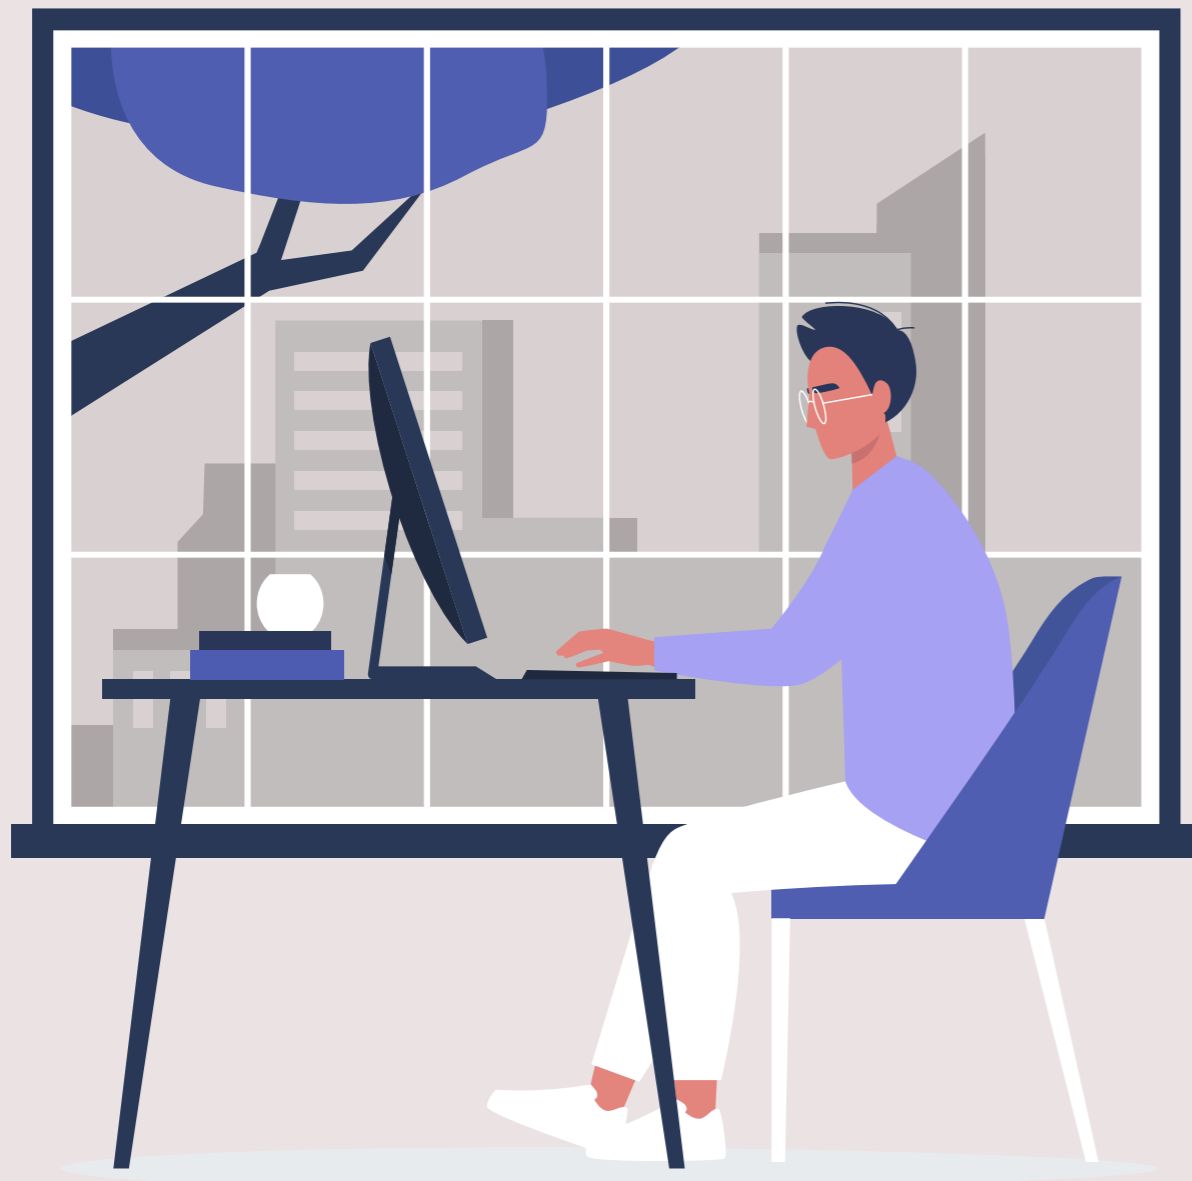

## Conclusie

Nu de pandemie ogenschijnlijk zijn plek heeft gekregen in de samenleving worden de mentale gevolgen voor de geestelijke gezondheid nu pas duidelijk. Vanuit deze survey blijkt dat een groot gedeelte van de medewerkers in de ggz 16-55% meer gespannenheid, en gevoelens van somberheid en angst ervaren. Dit zijn substantieële cijfers welke zeer relevant zijn en welke aandacht vragen. Daarbij de verzuimpercentages onder medewerkers mee lijken te vallen en zij aangaven niet minder vrije dagen te hebben opgenomen. De kans op het ontwikkelen van burnout moet gezien deze gegevens niet onderschat worden en is een serieus te nemen signaal. Dit vraagt vanuit ggz-instellingen aandacht en stappen om de mentale gezondheid van hun personeel te ondersteunen. Te meer ook omdat 3-6% van de ondervraagden overweegt te stoppen met het werken in de zorg en de krapte op de arbeidsmarkt binnen de ggz reeds zorgwekkend is. De corona-pandemie heeft dus grote invloed gehad op mentale gezondheid van medewerkers.

Voor meer informatie en indien je alle gegevens wil ontvangen kun je contact opnemen met:

**dr. A. (Anneloes) van den Broek** ([a.vandenbroek@ggzbreburg.nl](mailto:a.vandenbroek@ggzbreburg.nl)) en/of  
**dr. L. (Lars) de Vroege** ([l.devroege@ggzbreburg.nl](mailto:l.devroege@ggzbreburg.nl)).

“We beloven iedereen die een beroep op ons doet, dat we samen de weg zoeken, vanuit alle complexiteit, naar een situatie die je weer aan kunt. Van te groot naar klein genoeg. Zodat jij je leven de baas blijft”

**Contact**

Tel.: 088 - 016 16 16

[info@ggzbreburg.nl](mailto:info@ggzbreburg.nl)

[www.ggzbreburg.nl](http://www.ggzbreburg.nl)
